# Supplementary material for: Observation of the Magnonic Dicke Superradiant Phase Transition
Source: Research Square preprint supplement (doi:10.21203/rs.3.rs-3892560/v1), 2024-01-26
Supplement: Supplementary file 1 [file 111e63e5ae9338b3c4e597c0.pdf]

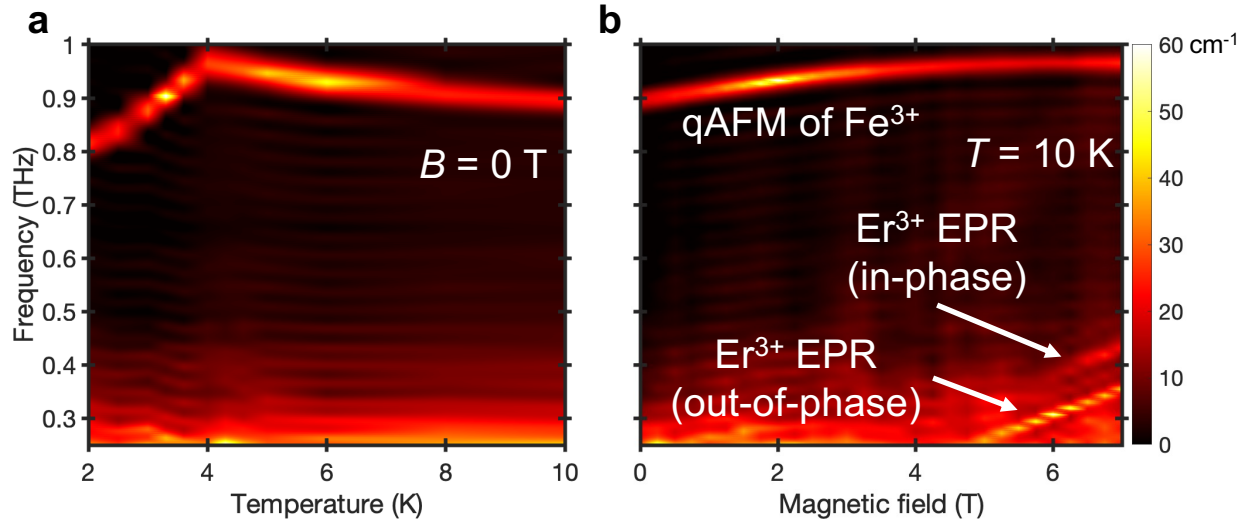

**Extended Data Fig. 1. Terahertz absorption coefficient spectra.** **a**, Absorption coefficient spectra as a function of temperature in THz-TDS, showing a kink at the phase boundary. **b**, Absorption coefficient spectra as a function of the magnetic field in THz-TDMS. The qAFM mode of  $\text{Fe}^{3+}$  and two  $\text{Er}^{3+}$  EPR modes are observed. Fig. 3b (right panel) plots the out-of-phase mode. Our mean-field calculation in Extended Data Fig. 5c shows all three modes.

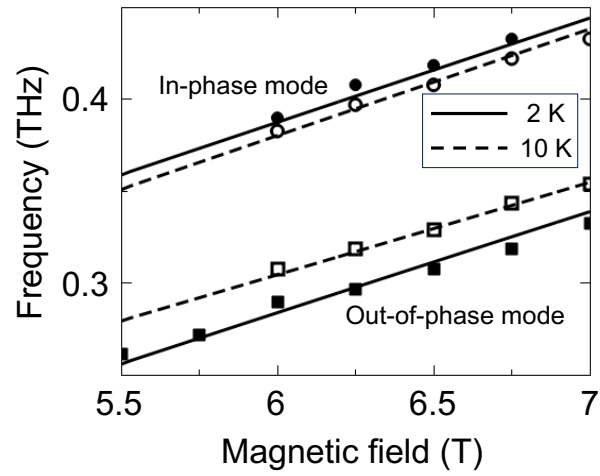

605 **Extended Data Fig. 2.** In-phase and out-of-phase modes of  $\text{Er}^{3+}$  spins below and above the critical  
 606 temperature, showing shifts only for the 2 K case; Lines (theory), filled points (2 K, experiment)  
 607 and empty points (10 K, experiment).

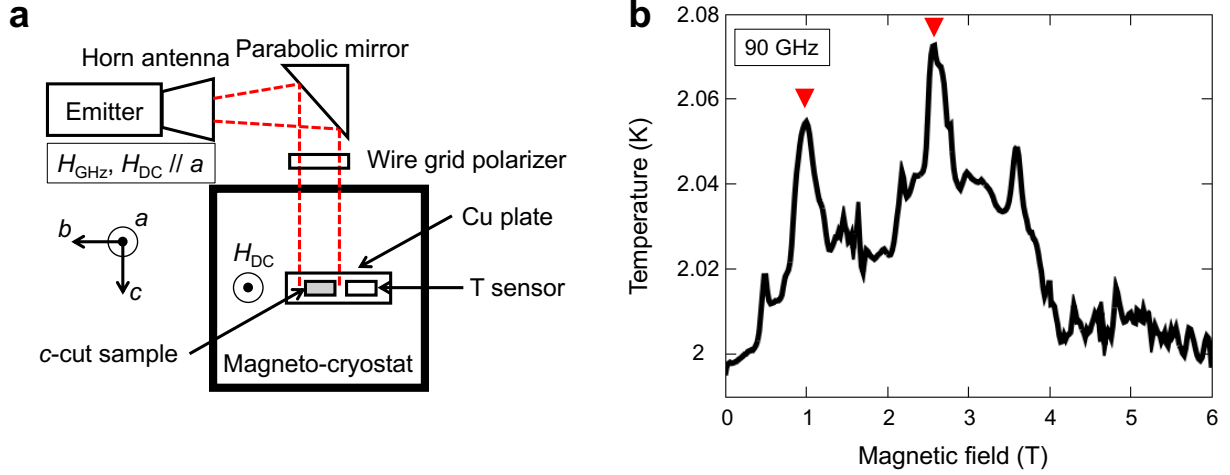

**Extended Data Fig.3. Thermal detection of  $\text{Er}^{3+}$  EPR modes.** **a**, A schematic of the setup for thermal detection. **b**, The sample temperature as a function of the static magnetic field with 90 GHz illumination. The temperature increases when the incident photon energy coincides with the transition energy of magnetic resonances.

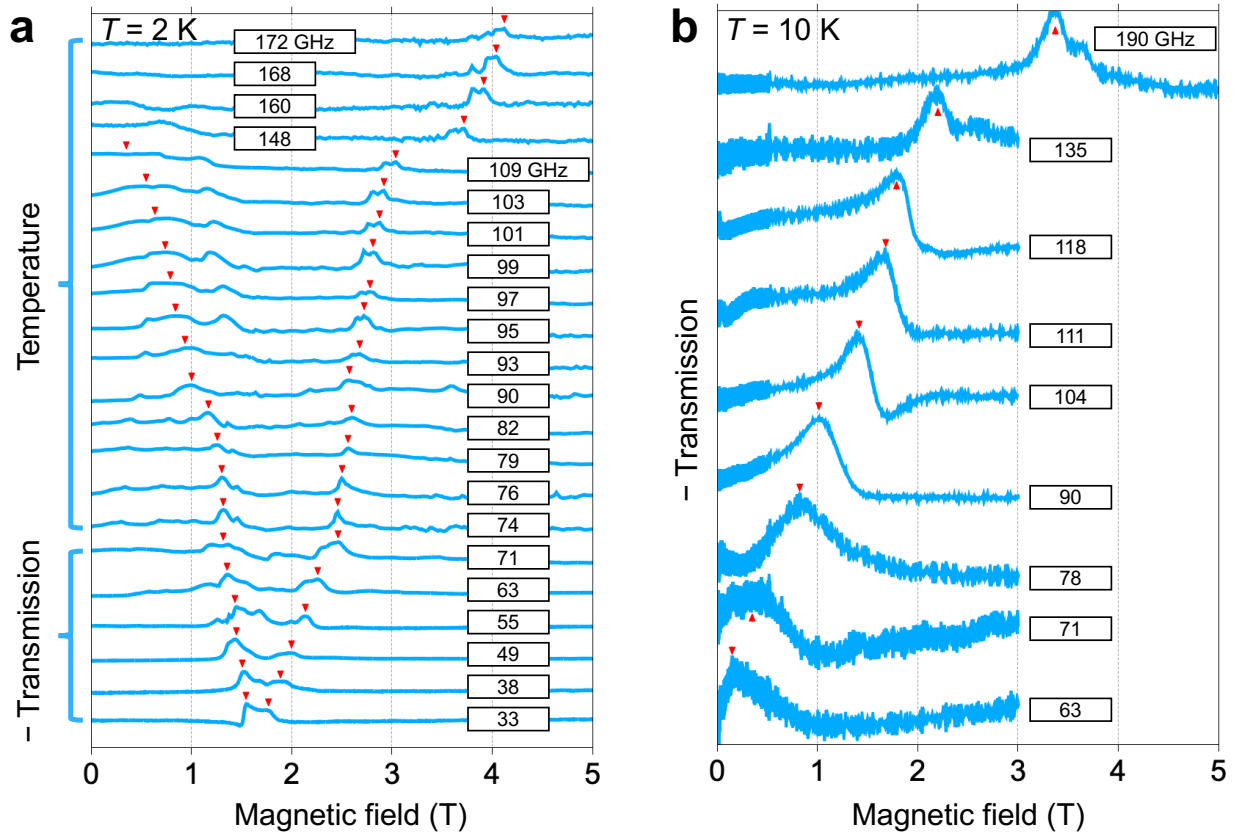

**Extended Data Fig. 4. Raw data of GHz measurements with 0-to-1 scale.** **a**, From 33 to 71 GHz (74 to 172 GHz), transmission (temperature) spectra as a function of the magnetic field at 2 K. These data are used to generate the two middle and bottom panels in Fig. 2c. **b**, From 63 to 190 GHz, transmission spectra as a function of the magnetic field at 10 K. Red triangles indicate the resonance peak positions in Fig. 3b (right panel, red circles).

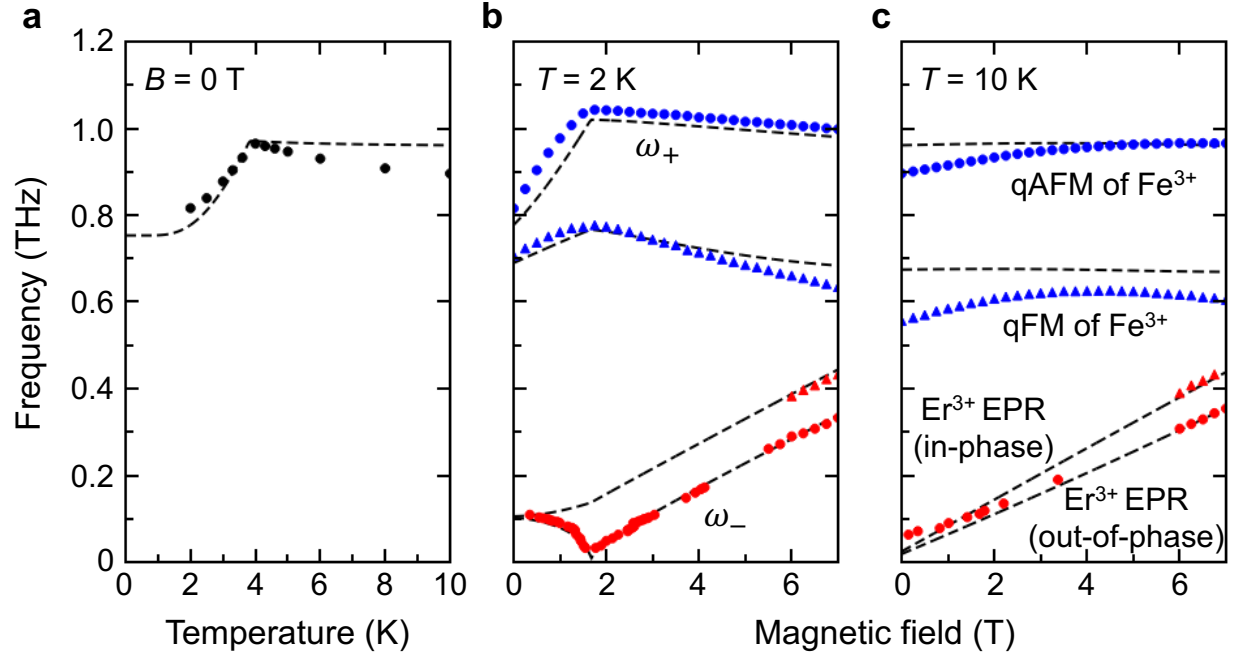

**Extended Data Fig. 5. Comparison between experimental data and fitting results.** **a**, Temperature dependent absorption peaks of the qAFM mode of  $\text{Fe}^{3+}$  extracted from Extended Data Fig. 1a. **b**, **c**, Magnetic field dependent absorption peaks of all four modes at 2 K (**b**) and at 10 K (**c**). We present our fitting curves in (**a**) and (**b**), and calculations for 10 K in (**c**). The blue circles, red triangles, and red circles in (**b**) are extracted from Fig. 2c, while those in (**c**) are from Extended Data Fig. 1b. The blue triangles correspond to the qFM mode of  $\text{Fe}^{3+}$ , obtained from separate experiments with a  $90^\circ$  rotated incident THz magnetic field polarization (not shown).

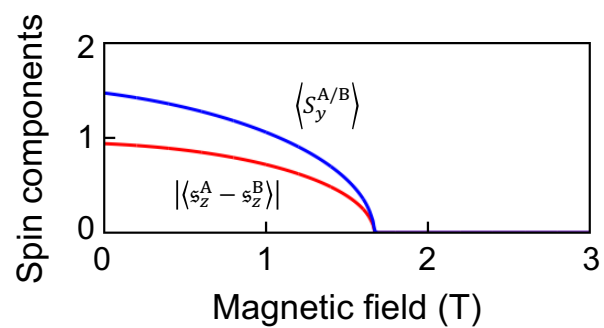

624 **Extended Data Fig. 6.** Two order parameters evidencing the magnonic SRPT calculated at 2 K in  
 625 the presence of the magnetic field.

| Fe <sup>3+</sup> subsystem                | Er <sup>3+</sup> subsystem                | Fe <sup>3+</sup> -Er <sup>3+</sup> interaction |
|-------------------------------------------|-------------------------------------------|------------------------------------------------|
| $J_{\text{Fe}} = 4.96 \text{ meV}$        | $J_{\text{Er}} = 0.01328(5) \text{ meV}$  | $J = 0.6 \text{ meV}$                          |
| $D_{\text{Fe}}^y = -0.107 \text{ meV}$    | $A_{\text{Er}}^x = 0.124(4) \text{ meV}$  | $D_x = 0.034 \text{ meV}$                      |
| $A_{\text{Fe}}^x = 0.0073 \text{ meV}$    | $A_{\text{Er}}^z = 0.1480(3) \text{ meV}$ | $D_y = 0.003 \text{ meV}$                      |
| $A_{\text{Fe}}^z = 0.0176(3) \text{ meV}$ | $A_{\text{Er}}^{xz} = 0 \text{ meV}$      |                                                |
| $A_{\text{Fe}}^{xz} = 0 \text{ meV}$      | $\mathfrak{g}_{\text{Er}}^x = 4.16(8)$    |                                                |
| $\mathfrak{g}_{\text{Fe}}^x = 3.5734(3)$  | $\mathfrak{g}_{\text{Er}}^y = 3.4$        |                                                |
| $\mathfrak{g}_{\text{Fe}}^y = 2$          | $\mathfrak{g}_{\text{Er}}^z = 9.6$        |                                                |
| $\mathfrak{g}_{\text{Fe}}^z = 0.6$        |                                           |                                                |

Table 1: Mean field model parameters from fitting and Ref.<sup>5</sup>. Listed parameter uncertainties are errors of fit, determined by the method in Ref.<sup>47</sup>.
