# Supplementary material for: Observation of the Magnonic Dicke Superradiant Phase Transition
Source: Research Square preprint supplement (doi:10.21203/rs.3.rs-3892560/v1), 2024-01-26
Supplement: Supplementary file 2 [file bda2e78a9d5fe44bfc1d4d32.pdf]

# Supplementary Information for “Observation of the Magnonic Dicke Superradiant Phase Transition”

Dasom Kim<sup>1,2,3†</sup>, Sohail Dasgupta<sup>4†</sup>, Xiaoxuan Ma<sup>5†</sup>, Joong-Mok Park<sup>3</sup>, Hao-Tian Wei<sup>4</sup>,  
Liang Luo<sup>3</sup>, Jacques Doumani<sup>1,2</sup>, Xinwei Li<sup>6</sup>, Wanting Yang<sup>5</sup>, Di Cheng<sup>3,7</sup>,  
Richard H. J. Kim<sup>3</sup>, Henry O. Everitt<sup>2,8,9</sup>, Shojiro Kimura<sup>10</sup>, Hiroyuki Nojiri<sup>10</sup>, Jigang Wang<sup>3,7</sup>,  
Shixun Cao<sup>5\*</sup>, Motoaki Bamba<sup>11</sup>, Kaden R. A. Hazzard<sup>4,8,12</sup>, and Junichiro Kono<sup>2,4,8,13\*</sup>

<sup>1</sup>*Applied Physics Graduate Program, Smalley–Curl Institute, Rice University, Houston, TX 77005, USA*

<sup>2</sup>*Department of Electrical and Computer Engineering, Rice University, Houston, TX 77005, USA*

<sup>3</sup>*Ames National Laboratory, Ames, IA 50011, USA*

<sup>4</sup>*Department of Physics and Astronomy, Rice University, Houston, TX 77005, USA*

<sup>5</sup>*Department of Physics, International Center of Quantum and Molecular Structures, and Materials Genome Institute, Shanghai University, Shanghai, 200444, China*

<sup>6</sup>*Department of Physics, National University of Singapore, 117551, Singapore*

<sup>7</sup>*Department of Physics and Astronomy, Iowa State University, Ames, IA 50011, USA*

<sup>8</sup>*Smalley–Curl Institute, Rice University, Houston, TX 77005, USA*

<sup>9</sup>*DEVCOM Army Research Laboratory-South, Houston, TX 77005, USA*

<sup>10</sup>*Institute for Materials Research, Tohoku University, Sendai 980-8577, Japan*

<sup>11</sup>*Department of Physics, Yokohama National University, Yokohama 240-8501, Japan*

<sup>12</sup>*Department of Physics and Astronomy, University of California, Davis, CA 95616, USA*

<sup>13</sup>*Department of Materials Science and NanoEngineering, Rice University, Houston, TX 77005, USA*

<sup>†</sup>These authors contributed equally to this work

\*Corresponding author. Email: kono@rice.edu (J.K.); sxcao@shu.edu.cn (S.C.)

## 1 SRPT at finite detuning.

2 An anti-crossing of two polaritons occurs at the zero-detuning point ( $\omega_0 = \omega_a$ ). When the  
3 normalized coupling strength ( $\eta \equiv g/\omega_0$ ) reaches the critical value of 0.5, the system undergoes  
4 the SRPT, and  $\omega_-$  becomes zero. As shown in Fig. S1a, for  $\eta = 0.5$  the SRPT occurs when  
5  $\omega_0 = \omega_a$ . For  $\eta = 0.1$  (Fig. S1b), a situation more comparable to  $\text{ErFeO}_3$ , we find the phase  
6 boundary moves to the  $\omega_a < \omega_0$ , while the anti-crossing still occurs at the zero-detuning point.  
7 Thus one can achieve the SRPTs with a small  $\eta$  as long as  $\nu \equiv \omega_a/\omega_0$  is small enough to satisfy  
8 the inequality in Eq. (2) in main text. By contrast, when  $\nu > 1$ , the  $\eta_c$  becomes higher than 0.5.

## 9 2 THz absorption spectra at high temperatures.

10 Extended Data Fig. 1a shows temperature-dependent absorption spectra of the qAFM mode of  
11  $\text{Fe}^{3+}$ . The kink occurs at 4 K which is the superradiant phase boundary at 0 T. Below this  
12 temperature, the  $\text{Fe}^{3+}$  order parameter  $\langle S_y^{A/B} \rangle$  becomes finite. Extended Data Fig. 1b shows  
13 magnetic field dependence of the qAFM mode of  $\text{Fe}^{3+}$  at 10 K. Only a slight change was ob-  
14 served at low magnetic fields without any signature of the phase transition, consistent with our  
15 phase diagram. Meanwhile, two modes that emerge at high fields are  $\text{Er}^{3+}$  EPR modes. As  
16 described in main text,  $\text{ErFeO}_3$  can be modeled by the two-sublattice model. This implies we  
17 should expect four modes in total: the qFM and qAFM modes for  $\text{Fe}^{3+}$  spins, and in-phase  
18 and out-of-phase EPR modes for  $\text{Er}^{3+}$  spins. Here, we are considering the relative phase of  
19 precession of two  $\text{Er}^{3+}$  spins. A detailed derivation is in Methods and follows that in Ref.<sup>1</sup>. Our  
20 theory finds the lowest mode is the out-of-phase mode that is coupled to qAFM, establishing a  
21 magnon-spin system. Due to the polarization selection rule described in Fig. 2b, the qFM mode  
22 does not appear in Extended Data Fig. 1.

## References

1. Bamba, M., Li, X., Marquez Peraca, N. & Kono, J. Magnonic superradiant phase transition. *Commun. Phys.* **5**, 3 (2022).

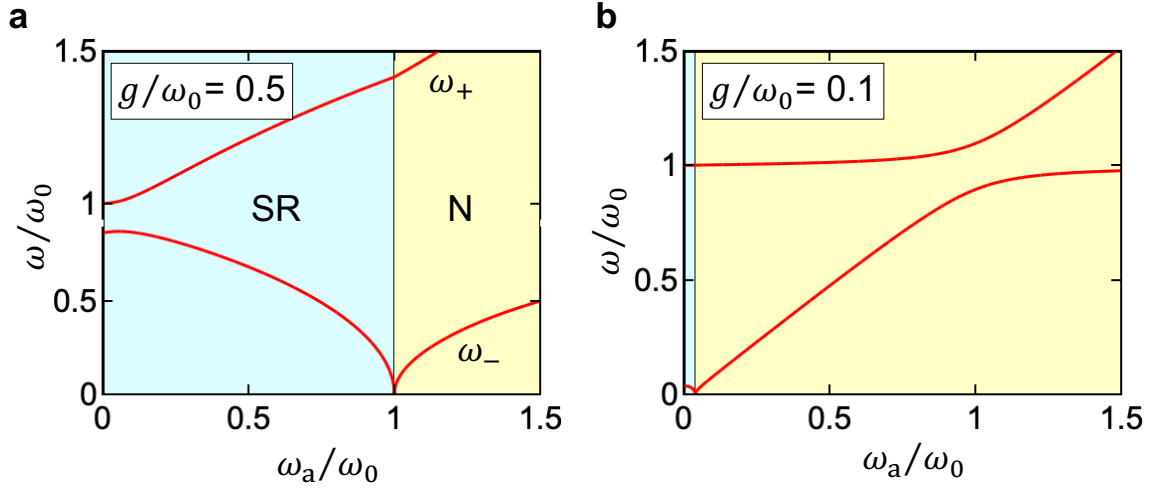

**Fig. S1. Occurrence of the superradiant phase transition at finite detuning.** **a, b,** Normalized frequencies of the upper-polariton ( $\omega_+$ ) and lower-polariton ( $\omega_-$ ) modes as a function of  $\omega_a/\omega_0$  calculated using the Dicke model without the  $A^2$  term with  $g/\omega_0 = 0.5$  (**a**) and with  $g/\omega_0 = 0.1$  (**b**).
